# Supplementary material
Source: publisher figshare collection journal article supplement (https://geolsoc.figshare.com/ndownloader/files/5427359)
Supplement: Supplementary file 1 [file 5427359]

Repeat runs of standards to accompany Neill et al. 'Origin of the Aves Ridge and Dutch-Venezuelan Antilles'.
See text for analytical details.
	JB-1A	JB-1A	JB-1A	JB-1A	JB-1A	JB-1A	JB-1A		Mean	1sigma	Relative (%)	2sigma	3sigma (LOD)	GEO-REM
Majors													detect limit	Certified Value
SiO2	52.32	52.68	52.1	52.61	52.31	53.18	52.74		52.53	0.38	0.72	105.07	157.60	52.41
TiO2	1.28	1.29	1.25	1.29	1.3	1.29	1.29		1.28	0.02	1.48	2.57	3.85	1.28
Al2O3	14.01	14.56	14.34	14.5	14.84	14.63	14.49		14.48	0.28	1.96	28.96	43.44	14.45
Fe2O3T	9.1	9.15	9.13	9.11	8.66	9.01	9.1		9.03	0.18	2.04	18.05	27.08	9.05
MnO	0.14	0.14	0.14	0.14	0.14	0.15	0.15		0.14	0.00	0.98	0.29	0.43	0.148
MgO	7.92	7.91	8.3	7.65	7.94	7.86	8.11		7.93	0.21	2.65	15.86	23.79	7.83
CaO	9.54	9.42	9.54	9.17	9.2	9.29	9.55		9.36	0.17	1.78	18.72	28.07	9.31
Na2O	2.68	2.71	2.67	2.77	2.69	2.78	2.76		2.72	0.05	1.79	5.43	8.15	2.73
K2O	1.32	1.33	1.39	1.42	1.42	1.4	1.26		1.38	0.04	3.02	2.76	4.14	1.4
P2O5	0.26	0.27	0.24	0.27	0.26	0.25	0.23		0.26	0.01	5.14	0.52	0.78	0.26
Traces
Sc	27.6	27.9	27.8	27.7	26.1	24.9	27.7		27.1	1.2	4.3	2.3	3.5	29
V	201.9	197.1	214.4	210.8	204.96	199.57	203.1		204.8	6.7	3.3	13.4	20.1	203
Cr	425.1	431.1	421.3	429.7	418	411.3	431.1		422.8	7.5	1.8	15.0	22.4	392
Co	38.9	38.8	36.6	38.7	36.8	37.3	38		37.9	1.1	2.8	2.1	3.2	38.1
Ni	197.2	140.9	145.2	137.1	138.9	129.3	133.1		148.1	24.6	16.6	49.2	73.8	140
Cu	57.6	58.7	60.7	56.4	56.7	53.3	57.9		57.2	2.5	4.3	4.9	7.4	56.7
Ga	17.6	18.3	17.6	18	17.9	17.2	18.6		17.8	0.4	2.2	0.8	1.2	18
Rb	43.5	40.3	39.9	36.9	41.5	33.9	41.3		39.3	3.4	8.7	6.8	10.2	39
Sr	441.4	452	439.6	447.9	441.3	436.5	442.9		443.1	5.7	1.3	11.4	17.1	444
Y	24	24.6	24.2	25.1	24	23.8	24.6		24.3	0.5	2.0	1.0	1.5	24
Zr	142.5	143.6	146.3	146	148.4	145.1	142.2		145.3	2.1	1.5	4.2	6.3	142
Nb	28	28	27.2	28.1	27.6	26.9	26.3		27.6	0.5	1.8	1.0	1.5	28
Ba	482.5	508.2	501.6	487.9	490.3	479.2	511.1		491.6	11.2	2.3	22.4	33.5	489
Hf	3.41	3.52	3.43	3.44	3.52	3.26	3.44		3.43	0.10	2.80	0.19	0.29	3.5
Ta	1.69	1.71	1.71	1.68	1.7	1.67	1.7		1.69	0.02	1.15	0.04	0.06	1.8
Pb	6.24	12.92	8.09	5.42	7.12	6.87	7.22		7.70	2.45	31.82	4.90	7.35	6.3
Th	8.94	9.04	8.84	8.77	8.67	8.67	8.95		8.84	0.14	1.62	0.29	0.43	9.2
U	1.59	1.72	1.67	1.68	1.68	1.59	1.62		1.65	0.05	2.98	0.10	0.15	1.6
REEs
La	37.5	38.87	37.41	37.62	37.19	36.02	38.49		37.58	0.92	2.45	1.84	2.76	38
Ce	63.95	66.78	63.19	65.86	66.39	65.21	67.18		65.51	1.48	2.26	2.97	4.45	66
Pr	7.11	7.2	7.12	7.06	7.06	7.09	7.61		7.18	0.2	2.73	0.39	0.59	7.2
Nd	25.57	27.4	25.56	25.3	26.43	25.68	25.63		25.94	0.73	2.82	1.46	2.19	26.3
Sm	4.97	5.3	4.99	5.03	5.07	4.96	5.31		5.09	0.15	2.98	0.3	0.46	5.1
Eu	1.48	1.65	1.47	1.49	1.48	1.46	1.58		1.52	0.07	4.52	0.14	0.21	1.46
Gd	4.58	4.86	4.71	4.64	4.67	4.69	5.69		4.83	0.39	8.02	0.78	1.16	4.7
Tb	0.67	0.71	0.68	0.71	0.69	0.66	0.73		0.69	0.03	3.81	0.05	0.08	0.72
Dy	3.93	4.26	3.97	4.1	4.05	3.9	4.34		4.08	0.17	4.12	0.34	0.5	4.1
Ho	0.72	0.73	0.72	0.74	0.74	0.72	0.78		0.74	0.02	2.95	0.04	0.07	0.83
Er	2.07	2.2	2.08	2.08	2.1	2.03	2.26		2.12	0.08	3.79	0.16	0.24	2.2
Tm	0.32	0.33	0.32	0.33	0.32	0.31	0.34		0.33	0.01	3.1	0.02	0.03	0.3
Yb	2.07	2.12	2.06	2.07	2.1	1.98	2.22		2.09	0.07	3.51	0.15	0.22	2.16
Lu	0.32	0.33	0.32	0.32	0.32	0.31	0.34		0.32	0.01	3.13	0.02	0.03	0.31
	NIM-G	NIM-G	NIM-G	NIM-G	NIM-G	NIM-G	NIM-G		Mean	1sigma	Relative (%)	2sigma	3sigma (LOD)	GEO-REM
Majors													detect limit	Certified Value
SiO2	76.47	76.27	75.43	76.24	76.79	76.73	75.60		76.22	0.52	0.69	1.05	1.57	75.88
TiO2	0.09	0.09	0.09	0.09	0.08	0.08	0.09		0.09	0.00	3.89	0.01	0.01	0.09
Al2O3	11.93	11.84	11.85	11.98	12.30	11.98	12.22		12.01	0.18	1.47	0.35	0.53	12.08
Fe2O3T	2.01	1.98	2.06	2.00	1.99	1.98	1.97		2.00	0.03	1.49	0.06	0.09	2.02
MnO	0.02	0.02	0.02	0.02	0.02	0.02	0.02		0.02	0.00	11.47	0.00	0.01	0.021
MgO	0.02	0.02	0.17	0.08	0.04	0.04	0.07		0.06	0.05	81.51	0.10	0.16	0.06
CaO	0.77	0.77	0.82	0.69	0.71	0.70	0.80		0.75	0.05	6.56	0.10	0.15	0.78
Na2O	3.24	3.29	3.31	3.38	3.39	3.46	3.47		3.36	0.09	2.59	0.17	0.26	3.36
K2O	4.97	4.80	4.95	5.20	5.06	4.88	4.95		4.97	0.13	2.56	0.25	0.38	4.93
P2O5	0.00	0.00	0.02	0.01	0.00	0.00	0.00		0.01	0.01	144.84	0.02	0.03	0.01
Traces
Sc	0.1	0.4	0.9	0.1	0.2	0.2	0.2		0.3	0.3	97.5	0.6	0.9	0.451
V	4.1	3.0	2.3	9.2			5.0		4.7	2.7	57.2	5.4	8.1	2
Cr	11.8	22.3	3.7	11.3	7.5	8.8	14.4		11.4	5.9	51.7	11.8	17.7	11.4
Co	0.5	2.5	0.1	4.5	0.5	1.1	1.2		1.5	1.5	102.6	3.0	4.6	4
Ni	19.6	15.0	7.3	13.9	12.0	5.7	11.1		12.1	4.7	38.8	9.4	14.1	8
Cu	13.4	17.1	16.7	6.2	22.7	13.1	16.9		15.2	5.1	33.4	10.1	15.2	11
Ga	29.5	27.5	27.7	26.7	26.7	26.2	28.1		27.5	1.1	4.1	2.2	3.3	27
Rb	400.3	324.6	308.9	302.4	297.1	276.0	313.7		317.6	39.5	12.4	79.0	118.5	320
Sr	12.8	8.8	8.5	5.8	7.6	7.1	9.0		8.5	2.2	25.7	4.4	6.6	10
Y	145.0	141.9	142.4	138.8	139.4	142.5	140.7		141.5	2.1	1.5	4.2	6.3	143
Zr	310.9	289.0	283.9	307.4	295.3	310.1	297.3		299.1	10.6	3.6	21.3	31.9	300
Nb	51.91	52.82	54.07	43.66	51.52	51.10	52.01		51.0	3.4	6.6	6.8	10.2	53
Ba	114.7	128.1	122.6	108.3	109.7	109.1	115.2		115.4	7.5	6.5	14.9	22.4	120
Hf	12.08	11.60	9.97	11.66	11.54	11.64	11.18		11.38	0.67	5.93	1.35	2.02	12
Ta	4.56	4.33	4.38	4.03	4.21	4.17	3.98		4.24	0.20	4.81	0.41	0.61	4.5
Pb	35.17	27.84	31.29	20.42	27.82	22.02	37.84		28.91	6.41	22.17	12.82	19.23	40
Th	50.52	48.71	45.44	48.40	41.69	43.82	47.09		46.52	3.07	6.59	6.14	9.20	51
U	17.08	16.04	16.72	15.56	15.50	14.97	15.72		15.94	0.73	4.60	1.47	2.20	15
REEs
La	114.38	106.48	106.45	107.09	104.28	103.80	99.33		105.97	4.55	4.29	9.09	13.64	109
Ce	206.47	186.46	189.12	193.05	195.44	189.47	190.25		192.90	6.65	3.45	13.30	19.95	195
Pr	22.01	19.53	20.74	18.87	19.10	17.99	20.15		19.77	1.33	6.72	2.66	3.98	20
Nd	71.24	69.74	67.20	71.54	64.81	61.72	61.41		66.81	4.28	6.40	8.56	12.83	72
Sm	14.57	14.98	13.80	14.83	12.96	12.43	13.67		13.89	0.96	6.94	1.93	2.89	15.8
Eu	0.33	0.34	0.32	0.33	0.30	0.29	0.41		0.33	0.04	11.95	0.08	0.12	0.35
Gd	14.34	14.14	13.90	13.30	13.29	13.59	15.30		13.98	0.70	5.04	1.41	2.11	14
Tb	2.59	2.69	2.46	2.48	2.37	2.31	2.39		2.47	0.13	5.32	0.26	0.39	3
Dy	18.03	17.28	17.04	15.98	16.20	16.32	16.75		16.80	0.72	4.26	1.43	2.15	17
Ho	3.77	3.64	3.47	3.36	3.43	3.25	3.49		3.49	0.17	5.00	0.35	0.52	4.13
Er	12.45	11.73	11.59	10.82	11.01	10.95	11.25		11.40	0.57	5.01	1.14	1.71	13
Tm	2.13	2.02	2.01	1.92	1.88	1.88	1.93		1.97	0.09	4.57	0.18	0.27	2
Yb	14.33	13.79	13.31	13.53	12.82	12.89	12.94		13.37	0.56	4.16	1.11	1.67	14.2
Lu	2.14	2.14	2.03	1.95	1.94	1.92	1.98		2.02	0.09	4.50	0.18	0.27	2
	BIR-1	BIR-1	BIR-1	BIR-1	BIR-1	BIR-1	BIR-1		Mean	1sigma	Relative (%)	2sigma	3sigma (LOD)	GEO-REM
Majors													detect limit	Certified Value
SiO2	47.67	46.13	47.51	47.99	48.28	47.26			47.47	0.75	1.58	1.50	2.24	47.7
TiO2	0.94	0.96	0.95	0.95	0.95	0.97			0.95	0.01	1.18	0.02	0.03	0.97
Al2O3	15.41	14.97	15.11	15.07	15.20	14.77			15.09	0.22	1.45	0.44	0.66	15.4
Fe2O3T	11.17	11.36	11.67	11.05	11.04	11.39			11.28	0.24	2.15	0.48	0.73	11.3
MnO	0.17	0.17	0.17	0.17	0.17	0.17			0.17	0.00	1.00	0.00	0.01	0.176
MgO	9.64	9.69	9.48	9.40	9.40	9.86			9.58	0.18	1.91	0.37	0.55	9.7
CaO	13.24	13.90	13.03	12.71	12.78	13.12			13.13	0.42	3.23	0.85	1.27	13.4
Na2O	1.72	2.25	1.77	1.80	1.89	1.77			1.87	0.19	10.37	0.39	0.58	1.81
K2O	0.02	0.03	0.04	0.02	0.02	0.03			0.03	0.01	30.13	0.02	0.02	0.03
P2O5	0.02	0.12	0.04	0.02	0.01	0.02			0.04	0.04	109.30	0.08	0.13	0.027
Traces
Sc	44.4	46.4	41.5	39.7	39.9	43.0			42.5	2.6	6.2	5.3	7.9	43
V	302.0	326.6	315.5			319.8			316.0	10.4	3.3	20.7	31.1	319
Cr	381.3	367.8	389.6	370.1	380.1	398.6			381.3	11.6	3.0	23.3	34.9	391
Co	50.4	51.3	45.7	49.2	44.3	51.2			48.7	3.0	6.1	5.9	8.9	52
Ni	177.5	161.8	168.1	183.8	148.2	160.3			166.6	12.8	7.7	25.6	38.4	166
Cu	113.7	150.8	111.0	118.8	91.4	122.8			118.1	19.4	16.4	38.7	58.1	119
Ga	15.2	15.3	14.6	15.1	15.8	15.6			15.3	0.4	2.6	0.8	1.2	15.3
Rb	0.3	0.3	0.2	0.2	0.1	0.4			0.3	0.1	34.9	0.2	0.3	0.2
Sr	105.1	109.6	105.3	100.9	98.4	97.2			102.8	4.7	4.6	9.4	14.1	109
Y	15.7	16.5	15.8	15.6	15.5	15.5			15.8	0.4	2.6	0.8	1.2	15.6
Zr	16.2	15.6	15.3	16.7	15.8	15.0			15.7	0.6	3.8	1.2	1.8	14
Nb	0.59	0.61	0.46	0.58	0.51	0.50			0.5	0.1	11.3	0.1	0.2	0.55
Ba	14.5	57.6	2.4	7.8	9.0	7.9			16.6	20.5	123.8	41.0	61.5	7.14
Hf	0.54	0.58	0.55	0.53	0.54	0.53			0.55	0.02	3.22	0.04	0.05	0.582
Ta	0.04	0.04	0.03	0.04	0.04	0.04			0.04	0.01	14.75	0.01	0.02	0.0357
Pb	3.11	2.47	1.70	5.60	6.50	4.76			4.03	1.89	46.89	3.77	5.66	3.1
Th	0.05	0.09	0.08	0.06	0.10	0.03			0.07	0.03	37.38	0.05	0.08	0.032
U	0.02	0.02	0.01	0.02	0.01	0.01			0.01	0.00	22.92	0.01	0.01	0.01
REEs
La	0.63	0.67	0.48	0.64	0.66	0.53			0.60	0.08	12.87	0.15	0.23	0.615
Ce	1.89	1.88	1.96	1.97	2.00	1.93			1.94	0.05	2.41	0.09	0.14	1.92
Pr	0.35	0.37	0.34	0.38	0.37	0.34			0.36	0.02	4.71	0.03	0.05	0.37
Nd	2.50	2.35	2.08	2.38	2.33	1.97			2.27	0.20	8.79	0.40	0.60	2.38
Sm	1.08	1.09	0.98	1.06	1.04	1.04			1.05	0.04	3.70	0.08	0.12	1.12
Eu	0.54	0.52	0.52	0.49	0.48	0.57			0.52	0.03	6.44	0.07	0.10	0.53
Gd	1.79	1.69	1.75	1.64	1.60	1.58			1.67	0.08	5.07	0.17	0.25	1.87
Tb	0.36	0.33	0.33	0.33	0.31	0.31			0.33	0.02	6.34	0.04	0.06	0.36
Dy	2.54	2.46	2.46	2.42	2.34	2.33			2.42	0.08	3.21	0.16	0.23	2.51
Ho	0.57	0.51	0.54	0.51	0.49	0.54			0.53	0.03	5.35	0.06	0.08	0.56
Er	1.68	1.55	1.64	1.55	1.58	1.54			1.59	0.06	3.70	0.12	0.18	1.66
Tm	0.26	0.25	0.24	0.25	0.24	0.23			0.25	0.01	4.51	0.02	0.03	0.25
Yb	1.64	1.63	1.63	1.62	1.54	1.59			1.61	0.04	2.41	0.08	0.12	1.65
Lu	0.27	0.26	0.26	0.26	0.24	0.24			0.26	0.01	4.15	0.02	0.03	0.25
